# Supplementary material for: The formation mechanism of ZnTPyP fibers fabricated by a surfactant-assisted method
Source: Royal Society of Chemistry journal article supplement (doi:10.1039/d0nj02829k), 2020-01-01
Supplement: d0nj02829k1.pdf [file d0nj02829k1.pdf]

## Supporting information

# Formation Mechanism of ZnTPyP Fibers Fabricated by Surfactant-Assisted Method

Keigo Tashiro,<sup>†</sup> Toshihiro Murafuji,<sup>†</sup> Michinori Sumimoto,<sup>‡</sup> Mamoru Fujitsuka,<sup>‡</sup> and Suzuko Yamazaki<sup>†,\*</sup>

<sup>†</sup>Division of Natural Science, Graduate School of Sciences and Technology for Innovation, Yamaguchi University, Yamaguchi 753-8512, Japan.

<sup>‡</sup>Division of Applied Chemistry, Graduate School of Sciences and Technology for Innovation, Yamaguchi University, Tokiwadai, Ube, 755-8611, Japan

<sup>‡</sup>The Institute of Scientific and Industrial Research (SANKEN), Osaka University, Mihogaoka 8-1, Ibaraki, Osaka 567-0047, Japan.

\*Corresponding author. Tel. & Fax: +81-83-933-5763, E-mail: yamazaki@yamaguchi-u.ac.jp

Table of Contents

**Figure S1.** TEM images of ZnTPyP (a) before and (b) after washing with water.

**Figure S2.** Absorption spectra of ZnTPyP fibers after being added into various solvents.

**Figure S3.** Electron densities in HOMO of ZnTPyP, TPyP, and ZnTPP calculated by functional of B3LYP/6-311G(d)/LANL2DZ.

**Figure S4.** <sup>1</sup>H-NMR spectra of 4,4'-bpy, ZnTPP and ZnTPP/4,4'-bpy in CDCl<sub>3</sub>.

**Table S1.** Cartesian coordinates for ZnTPyP and ZnTPP dimers (**1 - 3**) calculated by B97D method.

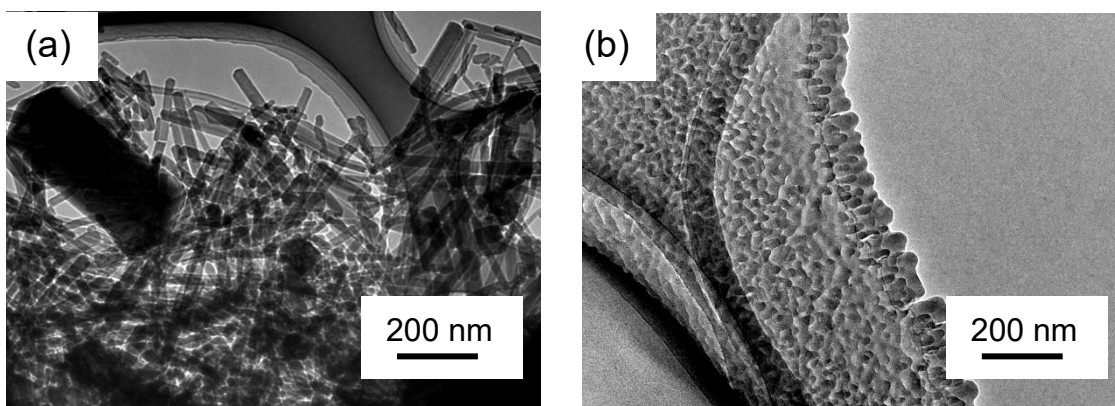

**Figure S1.** TEM images of ZnTPyP (a) before and (b) after washing with water.

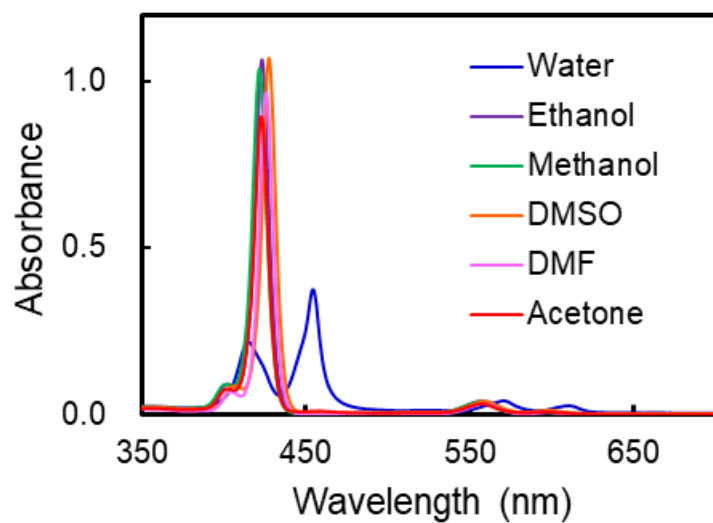

**Figure S2.** Absorption spectra of ZnTPyP fibers after being added into various solvents.

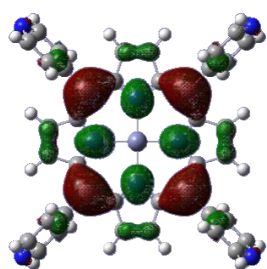

ZnTPyP  
(63.5°)

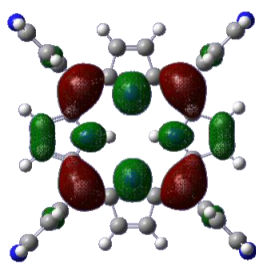

TPyP  
(90.0°)

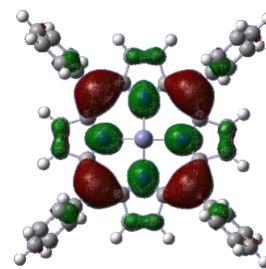

ZnTPP  
(73.5°)

**Figure S3.** Electron densities in HOMO of ZnTPyP, TPyP, and ZnTPP calculated by functional of B3LYP/6-311G(d)/LANL2DZ. Values in parentheses show dihedral angles between porphyrin macrocycle and phenyl or 4-pyridyl group.

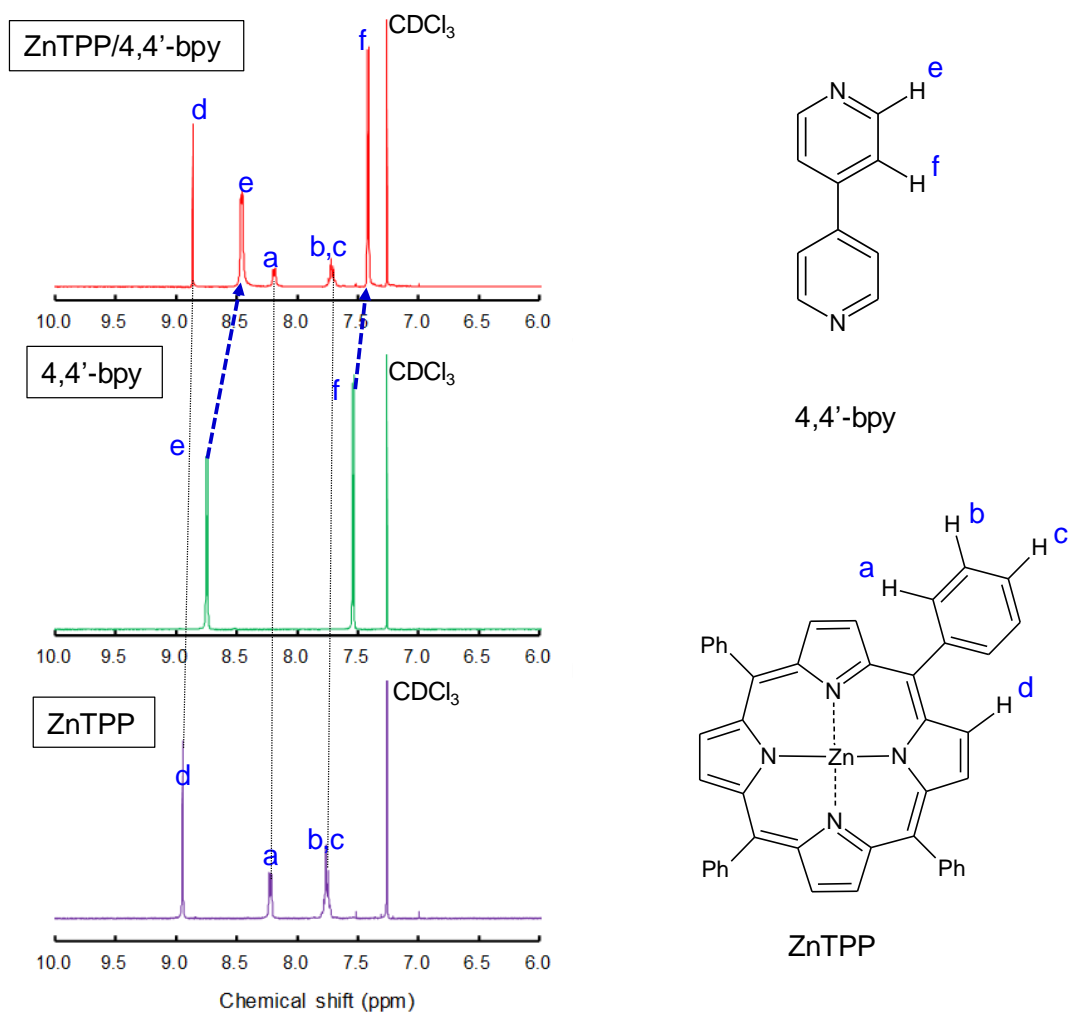

**Figure S4.**  $^1\text{H-NMR}$  spectra of 4,4'-bpy, ZnTPP and ZnTPP/4,4'-bpy in  $\text{CDCl}_3$ .

**Table S1.** Cartesian coordinates for ZnTPyP and ZnTPP dimers (**1 - 3**) calculated by B97D method.ZnTPyP dimer (Zn-N), **1**

|   |             |             |             |
|---|-------------|-------------|-------------|
| N | 0.17515100  | 4.60029900  | -2.07018100 |
| N | -0.68501200 | 6.46273700  | 0.05898300  |
| N | 1.04918800  | 5.04856500  | 1.98535500  |
| N | 1.85437400  | 3.16725400  | -0.12115000 |
| C | -0.75193100 | 5.32871300  | -2.77461900 |
| C | -1.31856800 | 7.04915500  | -1.00823200 |
| C | -0.85417000 | 7.28488700  | 1.14474700  |
| C | 0.48933500  | 5.96952200  | 2.83786900  |
| C | 1.83393100  | 4.21012600  | 2.74277100  |
| C | 2.67290700  | 2.72051500  | 0.88431000  |
| C | 2.14849100  | 2.43609100  | -1.24284200 |
| C | 0.53584900  | 3.52715700  | -2.85136500 |
| C | -0.21535800 | 3.56313900  | -4.09193100 |
| C | -1.00309900 | 4.68159100  | -4.04953100 |
| C | -1.88467600 | 8.31985400  | -0.58898800 |
| C | -1.59924400 | 8.46471000  | 0.74000500  |
| C | 0.90387100  | 5.67766800  | 4.19820200  |
| C | 1.73077900  | 4.58893500  | 4.13966900  |
| C | 3.58046300  | 1.71768800  | 0.35698200  |
| C | 3.25011800  | 1.53544700  | -0.95724500 |
| N | -1.76202800 | -6.38738300 | -0.37506100 |
| N | 1.09091000  | -6.01452800 | 0.26659300  |
| N | 0.65054300  | -3.12189300 | 0.50552500  |
| N | -2.16409700 | -3.47442800 | -0.28869200 |
| C | -1.35011700 | -7.69870700 | -0.46259300 |
| C | 1.06415600  | -7.39003800 | 0.21227800  |
| C | 2.35383600  | -5.64530000 | 0.67389300  |
| C | 2.01072800  | -3.14795500 | 0.72658400  |
| C | 0.27074200  | -1.80098800 | 0.45517200  |
| C | -2.17413300 | -2.11191800 | -0.09505300 |
| C | -3.45387700 | -3.85420900 | -0.58539800 |
| C | -3.07938500 | -6.34353400 | -0.77428100 |
| C | -3.51107400 | -7.67706100 | -1.14479700 |
| C | -2.44578500 | -8.51228800 | -0.95173600 |
| C | 2.35397100  | -7.91051200 | 0.62197600  |
| C | 3.14845800  | -6.83472600 | 0.90762000  |

|    |             |             |             |
|----|-------------|-------------|-------------|
| C  | 2.51150800  | -1.79017500 | 0.78188600  |
| C  | 1.43874500  | -0.95927800 | 0.61660500  |
| C  | -3.52389600 | -1.61186500 | -0.25786200 |
| C  | -4.31406200 | -2.68648100 | -0.56118300 |
| Zn | -0.54905000 | -4.75208500 | 0.03505400  |
| Zn | 0.36692900  | 4.66131300  | 0.03143400  |
| C  | -3.88242300 | -5.17858900 | -0.84462000 |
| C  | -0.05278600 | -8.17832100 | -0.15797300 |
| C  | 2.80243800  | -4.31451300 | 0.85667400  |
| C  | -1.04615700 | -1.32651500 | 0.23351800  |
| C  | -1.40403700 | 6.50358600  | -2.31418100 |
| C  | 1.46812400  | 2.52447800  | -2.48407700 |
| C  | 2.61373000  | 3.13974900  | 2.23769800  |
| C  | -0.36332900 | 7.03635300  | 2.45183300  |
| H  | -4.49182100 | -7.93534700 | -1.52750200 |
| H  | -2.39691000 | -9.57723500 | -1.14778600 |
| H  | -5.38473900 | -2.69317300 | -0.73080300 |
| H  | -3.83023200 | -0.57878400 | -0.13434900 |
| H  | 1.46071300  | 0.12081200  | 0.56534900  |
| H  | 3.54925700  | -1.50303600 | 0.89988200  |
| H  | 4.17155200  | -6.84507700 | 1.26590500  |
| H  | 2.60931500  | -8.96089800 | 0.70351800  |
| H  | -1.70539300 | 5.02239800  | -4.80214400 |
| H  | -0.16092200 | 2.82653700  | -4.88563300 |
| H  | -2.40454900 | 9.01991900  | -1.23329700 |
| H  | -1.84382100 | 9.30382200  | 1.38150300  |
| H  | 3.71563900  | 0.86487200  | -1.67057000 |
| H  | 4.36936900  | 1.22720800  | 0.91590600  |
| H  | 2.21752000  | 4.08465800  | 4.96707400  |
| H  | 0.59194100  | 6.22212200  | 5.08240000  |
| C  | -1.21650400 | 0.14967800  | 0.32871400  |
| C  | -0.88184400 | 0.83960500  | 1.50950900  |
| C  | -1.61586900 | 0.91712200  | -0.77840900 |
| C  | -0.85121100 | 2.23166400  | 1.50039400  |
| H  | -0.59431200 | 0.28892100  | 2.40301200  |
| C  | -1.55937600 | 2.30885800  | -0.69595300 |
| H  | -1.89129000 | 0.43439200  | -1.71407000 |
| N  | -1.14279400 | 2.96373500  | 0.40623500  |
| H  | -0.52272100 | 2.79548000  | 2.37318500  |

|   |             |              |             |
|---|-------------|--------------|-------------|
| H | -1.78957700 | 2.92985300   | -1.56003500 |
| C | -5.31279000 | -5.36322800  | -1.22958700 |
| C | -6.18689800 | -6.14228000  | -0.45181900 |
| C | -5.84321100 | -4.76342600  | -2.38499800 |
| C | -7.52039400 | -6.27839000  | -0.85630500 |
| H | -5.82994200 | -6.62406700  | 0.45771300  |
| C | -7.19209700 | -4.96683600  | -2.69993000 |
| H | -5.20738900 | -4.15689400  | -3.02889300 |
| N | -8.03476300 | -5.70803900  | -1.95972600 |
| H | -8.21485800 | -6.87498600  | -0.25944900 |
| H | -7.61875200 | -4.51265000  | -3.59776500 |
| C | 0.15885900  | -9.65361200  | -0.24138600 |
| C | -0.56330400 | -10.54538500 | 0.57039300  |
| C | 1.08828600  | -10.20935600 | -1.13771100 |
| C | -0.32552300 | -11.91993200 | 0.45026200  |
| H | -1.29031300 | -10.16752600 | 1.28835700  |
| C | 1.24544400  | -11.59990000 | -1.17998700 |
| H | 1.66878300  | -9.56352900  | -1.79545200 |
| N | 0.55959200  | -12.45901200 | -0.40607500 |
| H | -0.87348400 | -12.62689300 | 1.07827400  |
| H | 1.95845300  | -12.04904700 | -1.87587900 |
| C | 4.23554700  | -4.11095100  | 1.21877400  |
| C | 4.59988000  | -3.44033400  | 2.40035300  |
| C | 5.27823200  | -4.55684000  | 0.38830600  |
| C | 5.95605900  | -3.24290200  | 2.68504900  |
| H | 3.83196900  | -3.08263900  | 3.08501800  |
| C | 6.60326700  | -4.30944300  | 0.76810700  |
| H | 5.05482800  | -5.07270400  | -0.54483400 |
| N | 6.95760900  | -3.66284400  | 1.89215900  |
| H | 6.25382000  | -2.71741200  | 3.59569600  |
| H | 7.42558000  | -4.64253800  | 0.12992100  |
| C | 1.72937100  | 1.42763900   | -3.45778500 |
| C | 2.19505800  | 1.66515300   | -4.76298100 |
| C | 1.51244000  | 0.08537100   | -3.09083900 |
| C | 2.41027700  | 0.57759300   | -5.61829500 |
| H | 2.39844500  | 2.68211900   | -5.09592500 |
| C | 1.75848400  | -0.92621900  | -4.02510500 |
| H | 1.15796200  | -0.16054600  | -2.09099700 |
| N | 2.19930500  | -0.70592900  | -5.27646000 |

|   |             |             |             |
|---|-------------|-------------|-------------|
| H | 2.77850000  | 0.74590700  | -6.63356700 |
| H | 1.59104500  | -1.97189000 | -3.75322500 |
| C | -2.26606700 | 7.22270100  | -3.29508200 |
| C | -1.75116800 | 7.69280400  | -4.51687700 |
| C | -3.62981400 | 7.45943600  | -3.04404200 |
| C | -2.60241500 | 8.36003400  | -5.40526300 |
| H | -0.69936100 | 7.54605900  | -4.75930200 |
| C | -4.39358800 | 8.13465400  | -4.00319100 |
| H | -4.08347900 | 7.11081000  | -2.11703800 |
| N | -3.90733900 | 8.58672900  | -5.17252600 |
| H | -2.21482200 | 8.73701700  | -6.35517900 |
| H | -5.45608200 | 8.31955200  | -3.82509000 |
| C | -0.77217200 | 7.99630500  | 3.51780200  |
| C | -2.12629900 | 8.21362400  | 3.82941900  |
| C | 0.17783100  | 8.72864800  | 4.25208000  |
| C | -2.45681100 | 9.12792200  | 4.83653800  |
| H | -2.90452700 | 7.66910700  | 3.29595000  |
| C | -0.26108100 | 9.62075900  | 5.23737800  |
| H | 1.24043100  | 8.60774000  | 4.04516300  |
| N | -1.55382000 | 9.83170900  | 5.54168200  |
| H | -3.50460500 | 9.30293400  | 5.09402200  |
| H | 0.46501400  | 10.20222700 | 5.81131300  |
| C | 3.42864200  | 2.35532300  | 3.20981200  |
| C | 3.23157300  | 0.96969400  | 3.36019200  |
| C | 4.42853900  | 2.94642400  | 4.00160800  |
| C | 4.02444800  | 0.26164000  | 4.26909400  |
| H | 2.47224100  | 0.45407400  | 2.77486800  |
| C | 5.16884800  | 2.14298100  | 4.87824700  |
| H | 4.63392800  | 4.01292800  | 3.91862100  |
| N | 4.98652400  | 0.81851700  | 5.02526000  |
| H | 3.87755500  | -0.81397500 | 4.39758800  |
| H | 5.95702000  | 2.58638600  | 5.49186800  |

ZnTPyP dimer ( $\pi$ - $\pi$ ), **2**

|   |             |            |             |
|---|-------------|------------|-------------|
| N | 0.03366800  | 0.96783200 | -1.58615000 |
| N | -0.62720600 | 3.49194600 | -0.25787400 |
| N | 1.79224800  | 3.27165800 | 1.38794700  |
| N | 2.50263800  | 0.77623200 | -0.00555300 |



|    |             |             |             |
|----|-------------|-------------|-------------|
| C  | -1.19217800 | 1.18866500  | -2.17117400 |
| C  | -1.67190000 | 3.44576300  | -1.15059700 |
| C  | -0.69954000 | 4.70028200  | 0.39781300  |
| C  | 1.26560000  | 4.41324300  | 1.94592200  |
| C  | 2.94748500  | 2.97816800  | 2.07039800  |
| C  | 3.64630800  | 0.95614600  | 0.73667600  |
| C  | 2.74688600  | -0.24208300 | -0.89676200 |
| C  | 0.52190400  | -0.21799300 | -2.08837100 |
| C  | -0.47194500 | -0.80683700 | -2.96586600 |
| C  | -1.52492200 | 0.06276200  | -3.01718900 |
| C  | -2.41330700 | 4.69130800  | -1.08061100 |
| C  | -1.81938000 | 5.45878100  | -0.11641700 |
| C  | 2.10052200  | 4.83756000  | 3.05226400  |
| C  | 3.13200900  | 3.94314700  | 3.13813400  |
| C  | 4.66325500  | 0.03198100  | 0.28067000  |
| C  | 4.11493100  | -0.69666500 | -0.73666500 |
| N  | -1.77102900 | -3.27064300 | -1.38858300 |
| N  | 0.64833000  | -3.49103500 | 0.25738200  |
| N  | -0.01255700 | -0.96690100 | 1.58561700  |
| N  | -2.48151000 | -0.77533000 | 0.00505300  |
| C  | -1.24430200 | -4.41215100 | -1.94662500 |
| C  | 0.72075800  | -4.69929300 | -0.39843300 |
| C  | 1.69304700  | -3.44485000 | 1.15008100  |
| C  | 1.21328200  | -1.18776300 | 2.17065900  |
| C  | -0.50073800 | 0.21898200  | 2.08777000  |
| C  | -2.72578900 | 0.24295400  | 0.89627100  |
| C  | -3.62519600 | -0.95529700 | -0.73715700 |
| C  | -2.92630600 | -2.97721700 | -2.07099200 |
| C  | -3.11075900 | -3.94214300 | -3.13878600 |
| C  | -2.07918700 | -4.83646200 | -3.05300400 |
| C  | 1.84066900  | -5.45775700 | 0.11568800  |
| C  | 2.43454800  | -4.69033500 | 1.07995500  |
| C  | 1.54607600  | -0.06184200 | 3.01661300  |
| C  | 0.49317100  | 0.80783500  | 2.96520300  |
| C  | -4.09387400 | 0.69744200  | 0.73624500  |
| C  | -4.64218800 | -0.03121100 | -0.28109100 |
| Zn | -0.82186600 | -2.03294800 | -0.00924600 |
| Zn | 0.84302700  | 2.03387400  | 0.00869500  |
| C  | -3.81504000 | -1.92275600 | -1.75426800 |

|   |             |             |             |
|---|-------------|-------------|-------------|
| C | -0.11640900 | -5.10964600 | -1.46079500 |
| C | 2.00201900  | -2.35311300 | 2.00131100  |
| C | -1.79438600 | 0.75289200  | 1.83619700  |
| C | -1.98092300 | 2.35400400  | -2.00178700 |
| C | 1.81553000  | -0.75191500 | -1.83677700 |
| C | 3.83617600  | 1.92364800  | 1.75374600  |
| C | 0.13774000  | 5.11078100  | 1.46005400  |
| H | -3.92655300 | -3.94083700 | -3.85271900 |
| H | -1.90329300 | -5.70890200 | -3.67249400 |
| H | -5.65270600 | 0.02663600  | -0.66814900 |
| H | -4.58188300 | 1.45203300  | 1.34147500  |
| H | 0.41237900  | 1.76911300  | 3.45637200  |
| H | 2.47192900  | 0.07184900  | 3.55988700  |
| H | 3.28831400  | -4.95123100 | 1.69424300  |
| H | 2.13080800  | -6.44852600 | -0.21495400 |
| H | -2.45077200 | -0.07094300 | -3.56046700 |
| H | -0.39104500 | -1.76805800 | -3.45713600 |
| H | -3.26705400 | 4.95219500  | -1.69492800 |
| H | -2.10944800 | 6.44960700  | 0.21411700  |
| H | 4.60289500  | -1.45133000 | -1.34183900 |
| H | 5.67374700  | -0.02593100 | 0.66778300  |
| H | 3.94779000  | 3.94182400  | 3.85208100  |
| H | 1.92473100  | 5.71007300  | 3.67167700  |
| C | -2.23095100 | 1.89001700  | 2.69541400  |
| C | -2.13567500 | 1.81492600  | 4.09896900  |
| C | -2.76734900 | 3.07431900  | 2.16208000  |
| C | -2.54199700 | 2.90601900  | 4.87375800  |
| H | -1.75111600 | 0.91402500  | 4.57415300  |
| C | -3.14302200 | 4.10716500  | 3.02567700  |
| H | -2.86735900 | 3.19640400  | 1.08936300  |
| H | -2.46937100 | 2.85965600  | 5.96319600  |
| H | -3.53272900 | 5.04126000  | 2.61617000  |
| C | -5.07993800 | -1.83389100 | -2.53978500 |
| C | -6.00527200 | -2.89238700 | -2.57624800 |
| C | -5.40433500 | -0.67496400 | -3.26511900 |
| C | -7.18087200 | -2.74164600 | -3.32133100 |
| H | -5.81384800 | -3.80946100 | -2.02033900 |
| C | -6.60828000 | -0.62639000 | -3.97881200 |
| H | -4.73026200 | 0.17711700  | -3.26980500 |

|   |             |             |             |
|---|-------------|-------------|-------------|
| H | -7.91361700 | -3.55208000 | -3.35441600 |
| H | -6.86655000 | 0.27438000  | -4.53868900 |
| C | 0.21110400  | -6.41182800 | -2.11768700 |
| C | 0.01247200  | -7.62991700 | -1.44717500 |
| C | 0.73147600  | -6.46639800 | -3.42001500 |
| C | 0.34012700  | -8.82478800 | -2.09964000 |
| H | -0.39496500 | -7.64097400 | -0.43653000 |
| C | 1.03213000  | -7.71666200 | -3.97599200 |
| H | 0.92850600  | -5.55576200 | -3.98065500 |
| H | 0.18752400  | -9.78294000 | -1.59624700 |
| H | 1.45393700  | -7.77609700 | -4.98210600 |
| C | 3.24780700  | -2.46146900 | 2.81199400  |
| C | 3.23184100  | -2.34042300 | 4.21384800  |
| C | 4.49927000  | -2.68900500 | 2.21031600  |
| C | 4.43522300  | -2.42663700 | 4.92353900  |
| H | 2.29111300  | -2.18266000 | 4.73866400  |
| C | 5.64249200  | -2.76391200 | 3.01228300  |
| H | 4.57564100  | -2.77411700 | 1.12974500  |
| H | 4.43648900  | -2.32588600 | 6.01140900  |
| H | 6.62175600  | -2.92156700 | 2.55412900  |
| C | 2.25227000  | -1.88875900 | -2.69630000 |
| C | 2.15761400  | -1.81291500 | -4.09985500 |
| C | 2.78839200  | -3.07334300 | -2.16333500 |
| C | 2.56454300  | -2.90348500 | -4.87505600 |
| H | 1.77315400  | -0.91180000 | -4.57471600 |
| C | 3.16475900  | -4.10561900 | -3.02734300 |
| H | 2.88776500  | -3.19603400 | -1.09062900 |
| H | 2.49248000  | -2.85652000 | -5.96450400 |
| H | 3.55436300  | -5.03991900 | -2.61820900 |
| C | -3.22676300 | 2.46236300  | -2.81237100 |
| C | -3.21096500 | 2.34132300  | -4.21422900 |
| C | -4.47814100 | 2.68993900  | -2.21054200 |
| C | -4.41443200 | 2.42756900  | -4.92376900 |
| H | -2.27030000 | 2.18356300  | -4.73915900 |
| C | -5.62146500 | 2.76485800  | -3.01236200 |
| H | -4.55433600 | 2.77509300  | -1.12996100 |
| H | -4.41583900 | 2.32680600  | -6.01163800 |
| H | -6.60066600 | 2.92256900  | -2.55409100 |
| C | -0.18941300 | 6.41329600  | 2.11649900  |

|   |             |             |             |
|---|-------------|-------------|-------------|
| C | -0.70931600 | 6.46869200  | 3.41898500  |
| C | 0.00924800  | 7.63101300  | 1.44528400  |
| C | -1.00950400 | 7.71934200  | 3.97437600  |
| H | -0.90643400 | 5.55845000  | 3.98023100  |
| C | -0.31790800 | 8.82630100  | 2.09720900  |
| H | 0.41633300  | 7.64144800  | 0.43449000  |
| H | -1.43092300 | 7.77939200  | 4.98061900  |
| H | -0.16529100 | 9.78414700  | 1.59323700  |
| C | 5.10104500  | 1.83478000  | 2.53930000  |
| C | 5.42539200  | 0.67588800  | 3.26471300  |
| C | 6.02639000  | 2.89326800  | 2.57576300  |
| C | 6.62930600  | 0.62733300  | 3.97846200  |
| H | 4.75130300  | -0.17618000 | 3.26942300  |
| C | 7.20195600  | 2.74254700  | 3.32089900  |
| H | 5.83499100  | 3.81032600  | 2.01981800  |
| H | 6.88753300  | -0.27340900 | 4.53840300  |
| H | 7.93470000  | 3.55298200  | 3.35399200  |
| N | -7.49649700 | -1.63579300 | -4.01866800 |
| N | 0.84580200  | -8.88844500 | -3.34373600 |
| N | 5.63453800  | -2.62857600 | 4.35022200  |
| N | -3.03237500 | 4.05042000  | 4.36475600  |
| N | -0.82314800 | 8.89074200  | 3.34145100  |
| N | 7.51754000  | 1.63672000  | 4.01829900  |
| N | -5.61367500 | 2.62952600  | -4.35030300 |
| N | 3.05493900  | -4.04805800 | -4.36645300 |

ZnTPP dimer ( $\pi$ - $\pi$ ), **3**

|   |             |             |             |
|---|-------------|-------------|-------------|
| N | 0.22211000  | 0.90199400  | -1.49122300 |
| N | -0.55077900 | 3.35594800  | -0.07129800 |
| N | 2.02355200  | 3.32730100  | 1.36105800  |
| N | 2.76864600  | 0.84425400  | -0.03421600 |
| C | -1.04879600 | 1.04689000  | -2.00019700 |
| C | -1.58754700 | 3.28537700  | -0.97336100 |
| C | -0.61739000 | 4.58866800  | 0.53907100  |
| C | 1.46283000  | 4.43453900  | 1.94900800  |
| C | 3.18758400  | 3.04975400  | 2.03735300  |
| C | 3.92948900  | 1.07550400  | 0.66344700  |
| C | 3.02885500  | -0.14781400 | -0.95012100 |

|    |             |             |             |
|----|-------------|-------------|-------------|
| C  | 0.74539500  | -0.26332000 | -2.00687200 |
| C  | -0.26704700 | -0.92223600 | -2.80865900 |
| C  | -1.37283900 | -0.11138900 | -2.80272300 |
| C  | -2.32115800 | 4.53790800  | -0.95113200 |
| C  | -1.72594000 | 5.33670000  | -0.01363900 |
| C  | 2.28386700  | 4.85291500  | 3.06861800  |
| C  | 3.34481200  | 3.99076600  | 3.12919800  |
| C  | 4.97860900  | 0.22411200  | 0.14587000  |
| C  | 4.43010700  | -0.51603600 | -0.86399300 |
| N  | -2.00195300 | -3.32605900 | -1.36198000 |
| N  | 0.57238600  | -3.35455400 | 0.07036200  |
| N  | -0.20097800 | -0.90102600 | 1.49083900  |
| N  | -2.74736900 | -0.84337900 | 0.03354800  |
| C  | -1.44139300 | -4.43352200 | -1.94963600 |
| C  | 0.63887700  | -4.58739900 | -0.53977600 |
| C  | 1.60899100  | -3.28404200 | 0.97261100  |
| C  | 1.07006800  | -1.04565500 | 1.99951700  |
| C  | -0.72423800 | 0.26436200  | 2.00627500  |
| C  | -3.00769400 | 0.14861300  | 0.94951900  |
| C  | -3.90806700 | -1.07447100 | -0.66438600 |
| C  | -3.16602300 | -3.04864500 | -2.03826600 |
| C  | -3.32341100 | -3.98997400 | -3.12982600 |
| C  | -2.26256000 | -4.85222000 | -3.06902800 |
| C  | 1.74726000  | -5.33550100 | 0.01315800  |
| C  | 2.34244000  | -4.53667400 | 0.95065100  |
| C  | 1.39418000  | 0.11283500  | 2.80170300  |
| C  | 0.28829500  | 0.92356600  | 2.80770000  |
| C  | -4.40897300 | 0.51676100  | 0.86326600  |
| C  | -4.95727700 | -0.22316900 | -0.14686100 |
| Zn | -1.01814600 | -2.00360500 | -0.08038000 |
| Zn | 1.03973600  | 2.00502700  | 0.07946100  |
| C  | -4.08313300 | -2.02793000 | -1.69778100 |
| C  | -0.25301900 | -5.07465600 | -1.52642700 |
| C  | 1.90324700  | -2.17839100 | 1.81315700  |
| C  | -2.05628400 | 0.72308800  | 1.82960000  |
| C  | -1.88186500 | 2.17971100  | -1.81386600 |
| C  | 2.07738000  | -0.72221000 | -1.83016800 |
| C  | 4.10471700  | 2.02908700  | 1.69670600  |
| C  | 0.27445800  | 5.07575300  | 1.52587100  |

|   |             |             |             |
|---|-------------|-------------|-------------|
| H | -4.13537700 | -3.98513400 | -3.84849000 |
| H | -2.04273600 | -5.68459900 | -3.72851700 |
| H | -5.98394100 | -0.21869400 | -0.49503000 |
| H | -4.91223000 | 1.23082800  | 1.50417700  |
| H | 0.17949600  | 1.88606100  | 3.29298700  |
| H | 2.35028400  | 0.30686100  | 3.27063100  |
| H | 3.18176100  | -4.78335500 | 1.59033700  |
| H | 2.01035600  | -6.35152100 | -0.25917500 |
| H | -2.32881900 | -0.30512200 | -3.27201900 |
| H | -0.15821200 | -1.88465000 | -3.29410100 |
| H | -3.16058900 | 4.78455400  | -1.59068900 |
| H | -1.98914400 | 6.35264600  | 0.25885900  |
| H | 4.93319900  | -1.23029700 | -1.50482200 |
| H | 6.00533600  | 0.21969100  | 0.49384500  |
| H | 4.15671300  | 3.98576700  | 3.84793300  |
| H | 2.06388900  | 5.68500500  | 3.72842000  |
| C | -2.52009700 | 1.85165200  | 2.68516300  |
| C | -2.39400000 | 1.78560900  | 4.08832000  |
| C | -3.15138300 | 2.97896700  | 2.12502700  |
| C | -2.90076500 | 2.80327200  | 4.90383400  |
| H | -1.91322300 | 0.91567900  | 4.53387000  |
| C | -3.67779200 | 3.98574200  | 2.93902300  |
| H | -3.21835000 | 3.06457800  | 1.04479000  |
| H | -2.79959200 | 2.72802100  | 5.98710500  |
| H | -4.16496000 | 4.84591700  | 2.47879700  |
| C | -5.35453400 | -1.95689500 | -2.47388600 |
| C | -6.25082100 | -3.04298700 | -2.50941200 |
| C | -5.67970300 | -0.78648800 | -3.18534100 |
| C | -7.44197400 | -2.96080800 | -3.23985000 |
| H | -6.00961600 | -3.94669700 | -1.95032500 |
| C | -6.86759200 | -0.70668400 | -3.92018000 |
| H | -4.99658600 | 0.05921200  | -3.16296400 |
| H | -8.13034400 | -3.80691700 | -3.24971200 |
| H | -7.09338800 | 0.20666100  | -4.47027400 |
| C | 0.05531100  | -6.39540200 | -2.15038900 |
| C | -0.84756500 | -7.47009400 | -2.02898200 |
| C | 1.24482000  | -6.59150800 | -2.87585200 |
| C | -0.56476800 | -8.70996000 | -2.61381600 |
| H | -1.76871600 | -7.32522500 | -1.46505500 |

|   |             |             |             |
|---|-------------|-------------|-------------|
| C | 1.52606200  | -7.82942500 | -3.46536400 |
| H | 1.93050600  | -5.75629300 | -2.99228300 |
| H | -1.27085400 | -9.53399300 | -2.50362900 |
| H | 2.44777800  | -7.96012500 | -4.03447200 |
| C | 3.15263500  | -2.26643300 | 2.62321300  |
| C | 3.11201900  | -2.15293900 | 4.02831500  |
| C | 4.39690300  | -2.52224600 | 2.01233500  |
| C | 4.27160600  | -2.30945800 | 4.79643400  |
| H | 2.15571700  | -1.96358900 | 4.51377800  |
| C | 5.55550000  | -2.68514200 | 2.77808500  |
| H | 4.44752900  | -2.57506400 | 0.92850300  |
| H | 4.21489400  | -2.22683800 | 5.88226700  |
| H | 6.50826700  | -2.87239600 | 2.28186500  |
| C | 2.54119100  | -1.85066000 | -2.68591200 |
| C | 2.41566200  | -1.78401900 | -4.08909100 |
| C | 3.17194400  | -2.97836000 | -2.12595700 |
| C | 2.92243000  | -2.80151800 | -4.90479200 |
| H | 1.93532700  | -0.91375500 | -4.53447000 |
| C | 3.69812000  | -3.98516300 | -2.94012000 |
| H | 3.23873100  | -3.06425300 | -1.04573600 |
| H | 2.82178800  | -2.72580600 | -5.98808100 |
| H | 4.18481500  | -4.84567700 | -2.48004200 |
| C | -3.13129400 | 2.26783100  | -2.62389800 |
| C | -3.09070500 | 2.15463300  | -4.02901900 |
| C | -4.37555900 | 2.52343900  | -2.01293300 |
| C | -4.25033700 | 2.31120000  | -4.79707200 |
| H | -2.13440700 | 1.96545600  | -4.51455700 |
| C | -5.53419900 | 2.68636300  | -2.77860900 |
| H | -4.42614600 | 2.57607200  | -0.92909300 |
| H | -4.19365600 | 2.22881100  | -5.88292400 |
| H | -6.48696900 | 2.87342800  | -2.28232300 |
| C | -0.03403400 | 6.39629000  | 2.15018100  |
| C | -1.22388800 | 6.59231500  | 2.87512000  |
| C | 0.86902900  | 7.47092900  | 2.02961200  |
| C | -1.50526300 | 7.83005700  | 3.46492300  |
| H | -1.90979000 | 5.75718900  | 2.99090900  |
| C | 0.58610600  | 8.71062400  | 2.61475100  |
| H | 1.79043800  | 7.32615700  | 1.46608400  |
| H | -2.42724700 | 7.96066800  | 4.03361600  |

|   |             |             |             |
|---|-------------|-------------|-------------|
| H | 1.29235600  | 9.53459900  | 2.50519800  |
| C | 5.37631900  | 1.95831400  | 2.47249300  |
| C | 5.70207300  | 0.78796600  | 3.18378600  |
| C | 6.27229300  | 3.04468600  | 2.50781700  |
| C | 6.89023100  | 0.70848900  | 3.91822800  |
| H | 5.01920400  | -0.05794100 | 3.16163300  |
| C | 7.46369400  | 2.96283700  | 3.23787600  |
| H | 6.03064200  | 3.94835000  | 1.94885300  |
| H | 7.11650100  | -0.20481100 | 4.46820200  |
| H | 8.15181100  | 3.80915300  | 3.24757200  |
| C | -7.75316700 | -1.79243700 | -3.95014400 |
| H | -8.68054200 | -1.72950800 | -4.52091800 |
| C | 0.62380400  | -8.89403800 | -3.33439100 |
| H | 0.84307700  | -9.85942600 | -3.79215700 |
| C | 5.49643400  | -2.58753500 | 4.17471700  |
| H | 6.39824100  | -2.72001100 | 4.77327100  |
| C | -3.55565300 | 3.90318600  | 4.33300000  |
| H | -3.96111900 | 4.69124400  | 4.96877100  |
| C | -5.47517200 | 2.58903300  | -4.17525900 |
| H | -6.37700600 | 2.72155800  | -4.77376100 |
| C | 3.57653100  | -3.90197100 | -4.33409600 |
| H | 3.98186400  | -4.68994000 | -4.97005100 |
| C | 7.77548000  | 1.79450700  | 3.94798000  |
| H | 8.70305600  | 1.73182800  | 4.51845400  |
| C | -0.60279700 | 8.89460400  | 3.33479600  |
| H | -0.82218500 | 9.85986000  | 3.79278300  |
